# Supplementary material
Source: publisher figshare collection journal article supplement (https://sage.figshare.com/ndownloader/files/14530397)
Supplement: Supplementary file 1 [file 14530397]

# **Do Incorporation Policies Matter?**

## **Immigrants' Identity and Relationships with the Receiving Society**

### **Appendix**

---

#### **Appendix A. Question Wording**

##### **Identity**

Question: People can think of themselves in various ways. For example, they may feel that they are members of various ethnic groups, such as Vietnamese (etc.), and that they are part of the larger society, [host society]. These questions are about how you think of yourself in this respect.

Answers are all 5-point Likert scale (strongly disagree to strongly agree)

- Ethnic identity
  - I feel that I am part of [ethnic] culture
  - I am proud of being [ethnic]
  - I am happy to be [ethnic]
  - Being part of [ethnic] culture is embarrassing to me
  - Being [ethnic] is uncomfortable for me
  - Being part of [ethnic] culture makes me feel happy
  - Being [ethnic] makes me feel good

- Majority Identity
  - I feel that I am part of [national] culture
  - I am proud of being [national]
  - I am happy to be [national]

### **Acculturation attitudes**

Question: Here are some statements about language, cultural traditions, friends etc. Please indicate how much you agree or disagree with each statement by checking the answer that applies best to you.

Answers are all 5-point Likert scale (strongly disagree to strongly agree)

- Separation
  - I would rather marry a [ethnic] than a [national]
  - I feel that [ethnic group] should maintain their own cultural traditions and not adapt to those of [national]
  - It is more important to me to be fluent in [ethnic] than in [national lang.]
  - I prefer to have only [ethnic] friends
  - I prefer social activities that involve [ethnic group members] only
- Marginalization
  - I feel that it is not important for [ethnic group] either to maintain their own cultural traditions or to adapt to those of [national]
  - I would not like to marry either a [national] or a [ethnic]
  - It is not important to me to be fluent either in [ethnic lang.] or [national lang.]
  - I don't want to attend either [national] or [ethnic] social activities

- I don't want to have either [national] or [ethnic] friends

- Assimilation

- I feel that [ethnic group] should adapt to [national] cultural traditions and not maintain those of their own
- I would rather marry a [national] than a [ethnic]
- It is more important to me to be fluent in [national lang.] than in [ethnic lang.]
- I prefer to have only [national] friends
- I prefer social activities that involve [nationals] only

- Integration

- I feel that [ethnic group] should maintain their own cultural traditions but also adapt to those of [national]
- I would be just as willing to marry a [national] as a [ethnic]
- It is important to me to be fluent in both [national lang.] and in [ethnic lang.]
- I prefer social activities that involve both [national members] and [ethnic members]
- I prefer to have both [ethnic] and [national] friends

**Perceived discrimination**

When people with different backgrounds are together, one may sometimes feel unfairly treated.

The following questions are about these kinds of experiences.

Answers are all 5-point Likert scale (strongly disagree to strongly agree)

- I think that others have behaved in an unfair or negative way towards my ethnic group
- I don't feel accepted by [national group]
- I feel [national group] has something against me
- I have been teased or insulted because of my ethnic background
- I have been threatened or attacked because of my ethnic background

How often do the following people treat you unfairly or negatively because of your ethnic background?

Answers are all 5-point Likert scale (Never, Rarely, Sometimes, Often, Very often)

- Teachers
- Other adults outside school
- Other students
- Other kids/teens outside school

## Appendix B. Summary Statistics

Table A1: Summary statistics of key socio-demographic variables - ICSEY Data

| Variable                         | Obs  | Mean   | Std. Dev. | Min | Max |
|----------------------------------|------|--------|-----------|-----|-----|
| Age                              | 4325 | 15.494 | 1.818     | 13  | 22  |
| Gender (1=Female)                | 4313 | .546   | .498      | 0   | 1   |
| Years in the Country             | 2684 | 9.397  | 4.884     | 0   | 21  |
| Generation (1=2nd)               | 3141 | .670   | .47       | 0   | 1   |
| Parents' occupation (1= Skilled) | 2742 | .595   | .491      | 0   | 1   |
| Ethnic lang. proficiency         | 4279 | .653   | .283      | 0   | 1   |
| Majority lang. proficiency       | 4288 | .857   | .18       | 0   | 1   |
| Citizenship (1=yes)              | 4054 | .648   | .477      | 0   | 1   |
| Neighborhood comp. (1=Diverse)   | 4055 | .366   | .587      | -1  | 1   |

Table A2: Summary statistics of dependent variables - ICSEY Data

| Variable             | Nbr. of Items | Mean | Std. Dev. | Cronbach's alpha |
|----------------------|---------------|------|-----------|------------------|
| <i>Identity</i>      |               |      |           |                  |
| Ethnic identity      | 7             | .62  | .14       | .86              |
| Majority identity    | 3             | .54  | .32       | .90              |
| <i>Acculturation</i> |               |      |           |                  |
| Assimilation         | 5             | .30  | .18       | .61              |
| Integration          | 5             | .74  | .17       | .48              |
| Separation           | 5             | .39  | .22       | .68              |
| Marginalization      | 5             | .19  | .17       | .59              |
| Perceived discrim.   | 9             | .25  | .18       | .85              |

Dependent variables are all indices ranging from 0 to 1, where 1 is the most positive value.

Table A3: Socio-demographics variables — Country means (ICSEY)

| <b>Country</b> | <b>N</b> | <b>Age</b> | <b>Years in Country</b> | <b>Citizenship</b><br>(1 = Citizen) | <b>Parents' training</b><br>(1 = Skilled) |
|----------------|----------|------------|-------------------------|-------------------------------------|-------------------------------------------|
| Australia      | 273      | 15         | 8.5                     | .94                                 | .82                                       |
| Canada         | 294      | 16.4       | 10.7                    | .75                                 | .85                                       |
| Finland        | 442      | 15.6       | 5.4                     | .36                                 | .45                                       |
| France         | 304      | 16.1       | 13.3                    | .76                                 | .92                                       |
| Germany        | 331      | 17         | 13                      | .39                                 | .65                                       |
| Netherlands    | 339      | 14.9       | 12.4                    | .87                                 | .61                                       |
| Norway         | 467      | 15.4       | 9.2                     | .67                                 | .46                                       |
| Portugal       | 560      | 15.4       | 7                       | .7                                  | .23                                       |
| Sweden         | 848      | 15.3       | 9.4                     | .59                                 | .49                                       |
| US             | 467      | 14.6       | 8.3                     | .61                                 | .76                                       |

## Appendix C. Results for Muslims respondents with individual level controls

Figure A1: National and Ethnic Identification of Muslim respondents by policy contexts

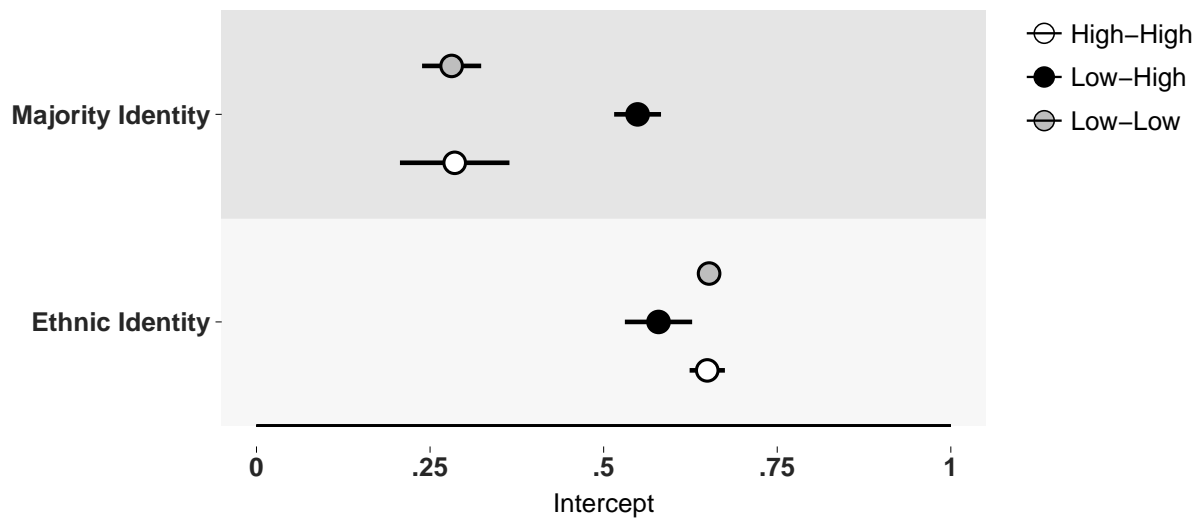

These estimates and their confidence intervals are intercept values when the identity measures are regressed within policy contexts on individual-level predictors (see text for details on these predictors).

Figure A2: Acculturation orientations of Muslim respondents by policy contexts

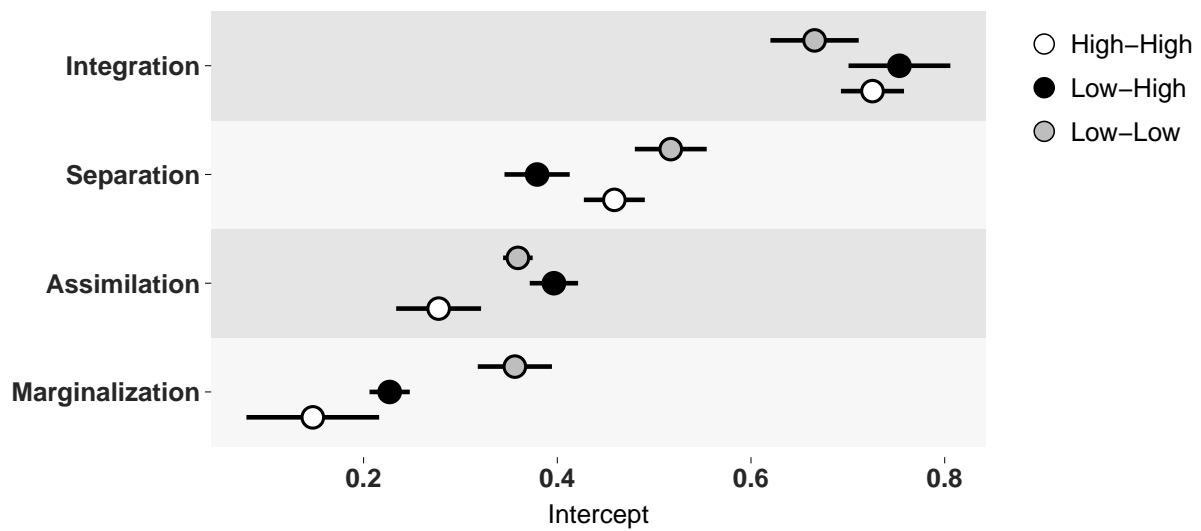

These estimates and their confidence intervals are intercept values when the four acculturation orientations are regressed within policy contexts on individual-level predictors (see text for details on these predictors).



Figure A3: Perceived discrimination and ethnic identity by policy contexts — Muslim respondents

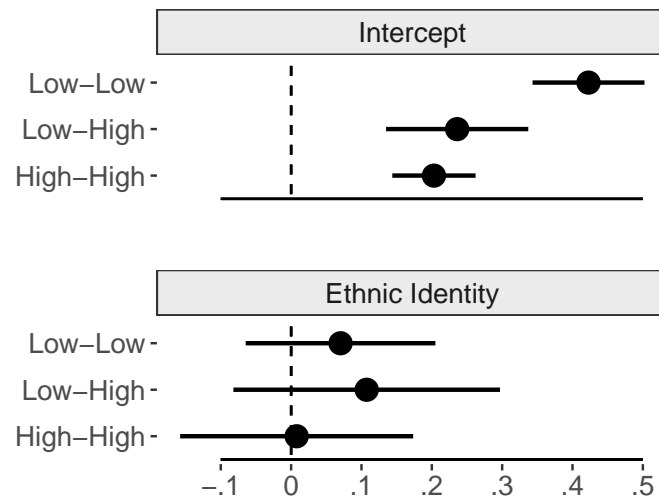

These estimates and their confidence intervals are intercept values when perceived discrimination is regressed within policy contexts on individual-level predictors (see text for details on these predictors).

## Appendix D. Multilevel models

The main objective of this analysis is to isolate the role of policies on individual attitudes (identification and acculturation) across countries. As stated in the “Visualizing multilevel data” section, this requires paying attention to the nested nature of the data—respondents are nested within countries and their respective policy contexts. The best strategy when dealing with nested data is to take into account its hierarchical character and use multilevel modeling to obtain estimates. In the present case however, the data offer only ten countries at level-2, which makes two important assumptions of multilevel modeling are problematic: a large sample at that level is important for the asymptotic properties of maximum likelihood estimators (MLE) (Stoker and Bowers, 2002; Bowers and Drake, 2005; Maas and Hox, 2005; Stegmueller, 2013). In the main text, I follow Bowers and Drake (2005) and present results graphically to overcome issues with the sample while still taking into account the hierarchical nature of the question and data at hand. However, previous studies have used multilevel modeling with restricted level-2 samples. Quillian (1995) has only twelve countries in his study of immigration attitudes while Weldon (2006) looks at tolerance attitudes in 16 European countries. Consequently, this appendix presents multilevel models of key dependent variables. These models offer results that confirm those obtained through graphical display and presented in the main text.

Table A4: Multilevel model of ethnic identification

| Variable                | OLS                  | Country-level factors |
|-------------------------|----------------------|-----------------------|
| Age                     | −0.008***<br>(0.002) | −0.005**<br>(0.002)   |
| <b>Citizenship</b>      |                      |                       |
| No Citizenship          |                      |                       |
| Citizenship             | −0.016**<br>(0.008)  | −0.041***<br>(0.008)  |
| <b>Parents' skills</b>  |                      |                       |
| Skilled                 |                      |                       |
| Unskilled               | −0.006<br>(0.007)    | −0.010<br>(0.008)     |
| <b>Years in Country</b> |                      |                       |
| 5-10 years              |                      |                       |
| 5 or less               | 0.010<br>(0.010)     | 0.001<br>(0.010)      |
| 11-15 years             | 0.004<br>(0.009)     | 0.008<br>(0.009)      |
| More than 15            | −0.007<br>(0.011)    | 0.016<br>(0.012)      |
| <b>Policies</b>         |                      |                       |
| Multiculturalism        |                      | 0.008<br>(0.007)      |
| Cship policies          |                      | 0.003<br>(0.010)      |
| Constant                | 0.617***<br>(0.009)  | 0.598***<br>(0.038)   |
| N                       | 1,528                | 1,528                 |
| R <sup>2</sup>          | 0.018                |                       |
| Adjusted R <sup>2</sup> | 0.014                |                       |

\* p &lt; .1; \*\* p &lt; .05; \*\*\* p &lt; .01

Table A5: Multilevel model of majority identification

| Variable                | OLS                 | Country-level factors |
|-------------------------|---------------------|-----------------------|
| Age                     | −0.006<br>(0.004)   | 0.001<br>(0.004)      |
| <b>Citizenship</b>      |                     |                       |
| No Citizenship          |                     |                       |
| Citizenship             | 0.219***<br>(0.016) | 0.206***<br>(0.015)   |
| <b>Parents' skills</b>  |                     |                       |
| Skilled                 |                     |                       |
| Unskilled               | 0.132***<br>(0.016) | 0.049***<br>(0.016)   |
| <b>Years in Country</b> |                     |                       |
| 5-10 years              |                     |                       |
| 5 or less               | 0.017<br>(0.021)    | −0.001<br>(0.020)     |
| 11-15 years             | −0.021<br>(0.019)   | −0.006<br>(0.018)     |
| More than 15            | −0.002<br>(0.024)   | −0.007<br>(0.023)     |
| <b>Policies</b>         |                     |                       |
| Multiculturalism        |                     | 0.003<br>(0.023)      |
| Cship policies          |                     | 0.031<br>(0.031)      |
| Constant                | 0.335***<br>(0.019) | 0.265**<br>(0.116)    |
| N                       | 1,520               | 1,520                 |
| R <sup>2</sup>          | 0.171               |                       |
| Adjusted R <sup>2</sup> | 0.168               |                       |

\*p &lt; .1; \*\*p &lt; .05; \*\*\*p &lt; .01

Table A6: Multilevel model of integration attitudes

| Variable                        | OLS                 | Country-level factors | Full Model          |
|---------------------------------|---------------------|-----------------------|---------------------|
| Ethnic identity                 | 0.123***<br>(0.031) | 0.127***<br>(0.032)   | -0.043<br>(0.081)   |
| Age                             | 0.004<br>(0.003)    | 0.007***<br>(0.003)   | 0.007***<br>(0.003) |
| <b>Citizenship</b>              |                     |                       |                     |
| No Citizenship                  |                     |                       |                     |
| Citizenship                     | -0.018*<br>(0.009)  | -0.015<br>(0.010)     | -0.016*<br>(0.010)  |
| <b>Parents' skills</b>          |                     |                       |                     |
| Skilled                         |                     |                       |                     |
| Unskilled                       | 0.028***<br>(0.009) | 0.028***<br>(0.010)   | 0.027***<br>(0.010) |
| <b>Years in Country</b>         |                     |                       |                     |
| 5-10 years                      |                     |                       |                     |
| 5 or less                       | -0.024*<br>(0.012)  | -0.016<br>(0.012)     | -0.017<br>(0.012)   |
| 11-15 years                     | -0.010<br>(0.011)   | 0.001<br>(0.011)      | 0.001<br>(0.011)    |
| More than 15                    | -0.001<br>(0.014)   | 0.021<br>(0.015)      | 0.025*<br>(0.015)   |
| <b>Policies</b>                 |                     |                       |                     |
| Multiculturalism                |                     | 0.002<br>(0.008)      | -0.003<br>(0.008)   |
| Cship policies                  |                     | 0.002<br>(0.011)      | 0.0002<br>(0.011)   |
| <b>Cross level interactions</b> |                     |                       |                     |
| Ethnic ID X MC policies         |                     |                       | 0.038**<br>(0.019)  |
| Ethnic ID X Cship policies      |                     |                       | 0.019<br>(0.024)    |
| Constant                        | 0.733***<br>(0.012) | 0.716***<br>(0.040)   | 0.734***<br>(0.042) |
| N                               | 1,523               | 1,523                 | 1,523               |
| R <sup>2</sup>                  | 0.021               |                       |                     |
| Adjusted R <sup>2</sup>         | 0.017               |                       |                     |

\* p &lt; .1; \*\* p &lt; .05; \*\*\* p &lt; .01

Table A7: Multilevel model of separation attitudes

| Variable                        | OLS                  | Country-level factors | Full Model           |
|---------------------------------|----------------------|-----------------------|----------------------|
| Ethnic identity                 | 0.308***<br>(0.038)  | 0.379***<br>(0.039)   | 0.236**<br>(0.097)   |
| Age                             | 0.002<br>(0.003)     | -0.002<br>(0.003)     | -0.003<br>(0.003)    |
| <b>Citizenship</b>              |                      |                       |                      |
| No Citizenship                  |                      |                       |                      |
| Citizenship                     | -0.003<br>(0.011)    | 0.015<br>(0.012)      | 0.012<br>(0.012)     |
| <b>Parents' skills</b>          |                      |                       |                      |
| Skilled                         |                      |                       |                      |
| Unskilled                       | -0.048***<br>(0.011) | -0.032***<br>(0.012)  | -0.033***<br>(0.012) |
| <b>Years in Country</b>         |                      |                       |                      |
| 5-10 years                      |                      |                       |                      |
| 5 or less                       | 0.071***<br>(0.015)  | 0.063***<br>(0.015)   | 0.063***<br>(0.015)  |
| 11-15 years                     | -0.014<br>(0.014)    | -0.019<br>(0.014)     | -0.017<br>(0.014)    |
| More than 15                    | -0.022<br>(0.017)    | -0.047***<br>(0.018)  | -0.044**<br>(0.018)  |
| <b>Policies</b>                 |                      |                       |                      |
| Multiculturalism                |                      | -0.007<br>(0.008)     | 0.001<br>(0.008)     |
| Cship policies                  |                      | -0.011<br>(0.011)     | -0.020*<br>(0.011)   |
| <b>Cross level interactions</b> |                      |                       |                      |
| Ethnic ID X MC policies         |                      |                       | -0.064***<br>(0.023) |
| Ethnic ID X Cship policies      |                      |                       | 0.078***<br>(0.029)  |
| Constant                        | 0.384***<br>(0.014)  | 0.420***<br>(0.043)   | 0.435***<br>(0.043)  |
| N                               | 1,522                | 1,522                 | 1,522                |
| R <sup>2</sup>                  | 0.085                |                       |                      |
| Adjusted R <sup>2</sup>         | 0.081                |                       |                      |

\* p &lt; .1; \*\* p &lt; .05; \*\*\* p &lt; .01

Table A8: Multilevel model of assimilation attitudes

| Variable                        | OLS                  | Country-level factors | Full Model           |
|---------------------------------|----------------------|-----------------------|----------------------|
| Ethnic identity                 | -0.168***<br>(0.032) | -0.220***<br>(0.033)  | -0.143*<br>(0.083)   |
| Age                             | -0.004<br>(0.003)    | -0.002<br>(0.003)     | -0.003<br>(0.003)    |
| <b>Citizenship</b>              |                      |                       |                      |
| No Citizenship                  |                      |                       |                      |
| Citizenship                     | 0.052***<br>(0.010)  | 0.038***<br>(0.010)   | 0.038***<br>(0.010)  |
| <b>Parents' skills</b>          |                      |                       |                      |
| Skilled                         |                      |                       |                      |
| Unskilled                       | -0.019**<br>(0.009)  | -0.011<br>(0.010)     | -0.010<br>(0.010)    |
| <b>Years in Country</b>         |                      |                       |                      |
| 5-10 years                      |                      |                       |                      |
| 5 or less                       | 0.005<br>(0.013)     | -0.009<br>(0.013)     | -0.009<br>(0.013)    |
| 11-15 years                     | -0.027**<br>(0.012)  | -0.018<br>(0.012)     | -0.017<br>(0.012)    |
| More than 15                    | -0.040***<br>(0.014) | -0.022<br>(0.015)     | -0.024<br>(0.015)    |
| <b>Policies</b>                 |                      |                       |                      |
| Multiculturalism                |                      | -0.004<br>(0.009)     | 0.003<br>(0.009)     |
| Cship policies                  |                      | 0.004<br>(0.012)      | 0.002<br>(0.012)     |
| <b>Cross level interactions</b> |                      |                       |                      |
| Ethnic ID X MC policies         |                      |                       | -0.050***<br>(0.019) |
| Ethnic ID X Cship policies      |                      |                       | 0.013<br>(0.025)     |
| Constant                        | 0.292***<br>(0.012)  | 0.301***<br>(0.045)   | 0.292***<br>(0.046)  |
| N                               | 1,526                | 1,526                 | 1,526                |
| R <sup>2</sup>                  | 0.046                |                       |                      |
| Adjusted R <sup>2</sup>         | 0.041                |                       |                      |

\* p &lt; .1; \*\* p &lt; .05; \*\*\* p &lt; .01

Table A9: Multilevel model of perceived discrimination

| Variable                        | OLS                 | Country-level factors | Full Model          |
|---------------------------------|---------------------|-----------------------|---------------------|
| Ethnic identity                 | 0.021<br>(0.033)    | -0.005<br>(0.034)     | 0.066<br>(0.085)    |
| Age                             | 0.001<br>(0.003)    | 0.004<br>(0.003)      | 0.004<br>(0.003)    |
| <b>Citizenship</b>              |                     |                       |                     |
| No Citizenship                  |                     |                       |                     |
| Citizenship                     | -0.005<br>(0.010)   | -0.007<br>(0.010)     | -0.007<br>(0.010)   |
| <b>Parents' skills</b>          |                     |                       |                     |
| Skilled                         |                     |                       |                     |
| Unskilled                       | -0.021**<br>(0.010) | -0.023**<br>(0.011)   | -0.023**<br>(0.011) |
| <b>Years in country</b>         |                     |                       |                     |
| 5-10 years                      |                     |                       |                     |
| 5 or less                       | 0.051***<br>(0.013) | 0.048***<br>(0.013)   | 0.049***<br>(0.013) |
| 11-15 years                     | -0.013<br>(0.012)   | -0.002<br>(0.012)     | -0.002<br>(0.012)   |
| More than 15                    | -0.010<br>(0.015)   | 0.007<br>(0.015)      | 0.006<br>(0.016)    |
| <b>Policies</b>                 |                     |                       |                     |
| Multiculturalism                |                     | 0.0001<br>(0.007)     | 0.004<br>(0.007)    |
| Cship policies                  |                     | 0.002<br>(0.010)      | 0.002<br>(0.010)    |
| <b>Cross level interactions</b> |                     |                       |                     |
| Ethnic ID X MC policies         |                     |                       | -0.028<br>(0.020)   |
| Ethnic ID X Cship policies      |                     |                       | -0.0001<br>(0.025)  |
| Constant                        | 0.263***<br>(0.012) | 0.260***<br>(0.037)   | 0.252***<br>(0.038) |
| N                               | 1,509               | 1,509                 | 1,509               |
| R <sup>2</sup>                  | 0.026               |                       |                     |
| Adjusted R <sup>2</sup>         | 0.021               |                       |                     |

\* p &lt; .1; \*\* p &lt; .05; \*\*\* p &lt; .01



## References

- Bowers, Jake and Katherine W Drake. 2005. "EDA for HLM: Visualization When Probabilistic Inference Fails." *Political Analysis* 13(4):301–326.
- Maas, Cora JM and Joop J Hox. 2005. "Sufficient Sample Sizes for Multilevel Modeling." *Methodology: European Journal of Research Methods for the Behavioral and Social Sciences* 1(3):86–92.
- Quillian, Lincoln. 1995. "Prejudice as a Response to Perceived Group Threat: Population Composition and Anti-Immigrant and Racial Prejudice in Europe." *American Sociological Review* 60:586–611.
- Stegmueller, Daniel. 2013. "How Many Countries for Multilevel Modeling? A Comparison of Frequentist and Bayesian Approaches." *American Journal of Political Science* 57(3):748–761.
- Stoker, Laura and Jake Bowers. 2002. "Designing Multi-level Studies:: Sampling Voters and Electoral Contexts." *Electoral Studies* 21(2):235–267.
- Weldon, Steven. 2006. "The Institutional Context of Tolerance for Ethnic Minorities: A Comparative, Multilevel Analysis of Western Europe." *American Journal of Political Science* 50(2):331–349.
